# Supplementary material for: Double Mutations in Succinate Dehydrogenase Are Involved in SDHI Resistance in Corynespora cassiicola
Source: MDPI journal article supplement (doi:10.3390/microorganisms10010132), 2022-01-09
Supplement: s1 [file s1]

## Supplementary Materials:

**Table S1.** List of cases of SDHI-resistant plant fungal pathogens, their origins, and the double mutations found to be associated with SDHI resistance.

| Species name               | Reported host  | Origin | Resistance mechanism<br>(Subunit-mutation)                                         | Reference |
|----------------------------|----------------|--------|------------------------------------------------------------------------------------|-----------|
| Mycosphaerella graminicola | Wheat          | Field  | C-N86S+B-N225T, C-N86S+ C-T79N<br>and C-N86S+C-L85P                                | 1         |
| Mycosphaerella graminicola | Wheat          | Lab    | B-S221P+C-R54G, B-H267Y+C-N86S, B-D166G+D-D129G, B-P155L+B-H267Y,<br>C-L85P+D-V96A | 3         |
| Alternaria solani          | Potato         | Field  | B-H278Y+C-H134R, B-H278R+C-H134R, D-T28A+D-A47T, B-277R+D-133R                     | 2, 4      |
| Alternaria alternata       | Potato         | Field  | B-H277Y+C-H134R and B-H277R+C-H134R                                                | 2, 5      |
| Alternaria alternata       | Murcott tangor | Field  | C-G84S+C-P130A                                                                     | 6         |

## Reference

- Minutes and recommendations of the SDHI Working Group from 21st of January 2021 are now available. FRAC
- Landschoot, S.; Carrette, J.; Vandecasteele M. Boscalid-resistance in *Alternaria alternata* and *Alternaria solani* populations: An emerging problem in Europe. *Crop Protection* **2017**, 92, 49-59.
- Fraaije, B.A.; Bayon, C.; Atkins, S.; Cools, H.J.; Lucas, J.A.; Fraaije, M.W. Risk assessment studies on succinate dehydrogenase inhibitors, the new weapons in the battle to control Septoria leaf blotch in wheat. *Mol. Plant Pathol.* **2012**, 13, 263-75.
- Miles, T.D.; Miles, L.A.; Fairchild, K.L.; Wharton, P.S. Screening and characterization of resistance to succinate dehydrogenase inhibitors in *Alternaria solani*. *Plant Pathology* **2014**, 63, 155-64.
- Avenot, H.F.; Van Den Biggelaar, H.; Morgan, D.P.; Moral, J.; Joosten, M.; Michailides, T.J. Sensitivities of Baseline Isolates and Boscalid-Resistant Mutants of *Alternaria alternata* from Pistachio to Fluopyram, Penthiopyrad, and Fluxapyroxad. *Plant Dis.* **2014**, 98, 197-205.
- Vega, B.; Dewdney, M.M. Sensitivity of *Alternaria alternata* from Citrus to Boscalid and Polymorphism in Iron-Sulfur and in Anchored Membrane Subunits of Succinate Dehydrogenase. *Plant Dis.* **2015**, 99, 23

**Table S2.** Isolates used in this study.

| Isolate | Genotype        | Mutation    |             | Origin | Location |
|---------|-----------------|-------------|-------------|--------|----------|
|         |                 | <i>sdhB</i> | <i>sdhD</i> |        |          |
| SD1     | WT              | WT          | WT          | Field  | Shandong |
| R25     | B-H278R         | H278R       | WT          | SD1    | -        |
| R34     | B-H278R         | H278R       | WT          | SD1    | -        |
| Y25     | B-H278Y         | H278Y       | WT          | SD1    | -        |
| V43     | B-I280V         | I280V       | WT          | SD1    | -        |
| V44     | B-I280V         | I280V       | WT          | SD1    | -        |
| E14     | D-D95E          | WT          | D95E        | SD1    | -        |
| H30     | D-H105R         | WT          | H105R       | SD1    | -        |
| V39     | D-G109V         | WT          | G09V        | SD1    | -        |
| ER149   | B-H278R+D-D95E  | H278R       | D95E        | E14    | -        |
| EV31    | B-I280V+D-D95E  | I280V       | D95E        | E14    | -        |
| EY54    | B-H278Y+D-D95E  | H278Y       | D95E        | E14    | -        |
| VR93    | B-H278R+D-G109V | H278R       | G109V       | V39    | -        |
| VV3     | B-I280V+D-G109V | I280V       | G109V       | V39    | -        |
| VY3     | B-H278Y+D-G109V | H278Y       | G109V       | V39    | -        |
| HV115   | B-I280V+D-H105R | I280V       | H105R       | H30    | -        |

**Table S3.** Primers and probes used in this study

| Primer | Sequence (5'-3')                           | Use                                                                                                                             |
|--------|--------------------------------------------|---------------------------------------------------------------------------------------------------------------------------------|
| P1     | CACTCTTCTTCGCCATCC                         | Amplify the <i>sdhB</i> gene of <i>C. cassicola</i> (1422 bp)                                                                   |
| P2     | CATCACAATCACGGTCAC                         |                                                                                                                                 |
| P3     | CTGCGATTGGGCTTTCTAC                        | Identification of the <i>sdhB</i> + <i>Trpc</i> + <i>neo</i> cassette integrated at the left junction (2575 bp)                 |
| P4     | TGTCCTCGTTCCTGTCTGC                        |                                                                                                                                 |
| P5     | GGGACTGGCTGCTATTGG                         | Identification of the <i>sdhB</i> + <i>Trpc</i> + <i>neo</i> cassette integrated at the right junction (2791 bp)                |
| P6     | CCTCCGAGGTCGAGGATTT                        |                                                                                                                                 |
| P7     | CGAGAGATGAAGAATCGGTA                       | Confirm the homozygosity of the <i>sdhB</i> + <i>Trpc</i> + <i>neo</i> cassette integrated at the left junction (3256/2091 bp)  |
| P8     | GACCAATCCACTCCGTTA                         |                                                                                                                                 |
| P9     | AAGACCTTCCACATCTACC                        | Confirm the homozygosity of the <i>sdhB</i> + <i>Trpc</i> + <i>neo</i> cassette integrated at the right junction (2192/1027 bp) |
| P10    | GGGTGACCAGAACAGTAT                         |                                                                                                                                 |
| P11    | CTGCGATTGGGCTTTCTA                         | Amplification of the upstream region and <i>sdhB</i> gene fragment (2352 bp)                                                    |
| P12    | CAATATCATCTTCTGTGCGACCTACGTGAAAGCCATGCTC   |                                                                                                                                 |
| P13    | CGCCTTCTTGACGAGTTCTTCTGAAGTCGTTGCTGAATGGGT | Amplification of the region downstream of the <i>sdhB</i> gene (1462 bp)                                                        |
| P14    | GGACTCGCACTTCCTCAA                         |                                                                                                                                 |
| P15    | GTCGACAGAAGATGATATTG                       | Amplification of the <i>Trpc</i> + <i>neo</i> gene (1165 bp)                                                                    |
| P16    | TCAGAAGAACTCGTCAAGAAGGCG                   |                                                                                                                                 |
| P17    | CGGACATGTCTAGCAAAGTC                       | Amplification of the <i>sdhB</i> + <i>Trpc</i> + <i>neo</i> gene replacement cassette (4484 bp)                                 |
| P18    | GCTTCTAACAAGTCCCGT                         |                                                                                                                                 |
| P19    | TTGAGATGGCTGTGGATATG                       | Amplification of the probe for <i>sdhB</i> (858 bp)                                                                             |

|     |                          |                                                                                           |
|-----|--------------------------|-------------------------------------------------------------------------------------------|
| P20 | AGATGTGGAAGGTCTTGGT      |                                                                                           |
| P21 | TCACCGTCATTGACGCCC       | Amplification of the <i>EF1-<math>\alpha</math></i> gene for quantitative real-time poly- |
| P22 | CGGCAGCGATAATGAGGATAG    | merase chain reaction (96 bp)                                                             |
| P23 | GCTGGACCTGAACAAGACCG     | Amplification of the <i>sdhB</i> gene for quantitative real-time poly-                    |
| P24 | GATGCCGGCAAAGACAGG       | merase chain reaction (166 bp)                                                            |
| P25 | CTACCACTGGAGCTTCGAGAGGGC | Amplification of the <i>sdhD</i> gene for quantitative real-time poly-                    |
| P26 | CGCTTGGCAGGGAAGTAGTCA    | merase chain reaction (174 bp)                                                            |
| P27 | GAAACATGCACGAGGACG       | Amplification of the <i>sdhA</i> gene for quantitative real-time poly-                    |
| P28 | TCGGTACGTGAGAATGGG       | merase chain reaction (157 bp)                                                            |
| P29 | TGGTCCAGCGGAGAGCGG       | Amplification of the <i>sdhC</i> gene for quantitative real-time poly-                    |
| P30 | TGGGGGCAGCCAGGTAGG       | merase chain reaction (213 bp)                                                            |

---

Table S4. Fitness of each mutant with respect to WT, for each fitness component test.

| SdhB/D substitution  | B-H278R                 | B-H278Y | B-I280V | D-D95E | D-H105R | D-G109V | B-I280V+D-D95E | B-I280V+D-H105R | B-I280V+D-G109V | B-H278R+D-G109V | B-H278R+D-D95E | B-H278Y+D-G109V | B-H278Y+D-D95E |
|----------------------|-------------------------|---------|---------|--------|---------|---------|----------------|-----------------|-----------------|-----------------|----------------|-----------------|----------------|
| Fitness component    | + = -                   | + = -   | + = -   | + = -  | + = -   | + = -   | + = -          | + = -           | + = -           | + = -           | + = -          | + = -           | + = -          |
| SDH activity         | 0 0 1                   | 0 0 1   | 0 1 0   | 0 1 0  | 0 0 1   | 0 0 1   | 0 1 0          | 0 0 1           | 0 0 1           | 0 0 1           | 0 1 0          | 0 0 1           | 0 0 1          |
| Conidia              | producti                | 0 0 1   | 0 0 1   | 0 0 1  | 0 1 0   | 0 1 0   | 1 0 0          | 0 1 0           | 0 1 0           | 0 1 0           | 0 0 1          | 0 1 0           | 0 0 1          |
|                      | germinat                | 0 1 0   | 0 1 0   | 0 0 1  | 0 1 0   | 0 0 1   | 0 1 0          | 0 1 0           | 0 0 1           | 0 0 1           | 0 1 0          | 0 1 0           | 0 1 0          |
| Mycelial growths     | 0 5 0                   | 0 1 4   | 1 3 1   | 1 4 0  | 0 4 1   | 0 5 0   | 0 4 1          | 0 3 2           | 0 5 0           | 0 1 4           | 0 4 1          | 0 3 2           | 0 3 2          |
| Pathogenicity        | 0 0 1                   | 0 1 0   | 0 1 0   | 0 1 0  | 0 1 0   | 0 1 0   | 0 1 0          | 0 1 0           | 0 1 0           | 0 1 0           | 0 0 1          | 0 1 0           | 0 0 1          |
| Environment stresses | osmotic stress          | 0 0 3   | 0 2 1   | 0 3 0  | 0 0 3   | 1 2 0   | 0 2 1          | 1 2 0           | 0 2 1           | 1 2 0           | 0 3 0          | 1 2 0           | 0 0 3          |
|                      | oxidative stress        | 0 1 0   | 0 1 0   | 1 0 0  | 0 1 0   | 0 1 0   | 0 1 0          | 0 1 0           | 1 0 0           | 1 0 0           | 0 1 0          | 0 1 0           | 1 0 0          |
|                      | cell wall damage        | 0 2 0   | 0 1 1   | 1 0 1  | 1 0 1   | 0 2 0   | 1 1 0          | 0 2 0           | 1 1 0           | 1 0 1           | 0 1 1          | 1 0 1           | 0 0 2          |
|                      | salicylhy droxamic acid | 0 1 0   | 0 1 0   | 0 1 0  | 0 1 0   | 0 1 0   | 0 1 0          | 0 1 0           | 0 1 0           | 0 0 1           | 0 1 0          | 0 1 0           | 0 0 1          |
| Total [0,16]         | 0 1 6                   | 0 8 8   | 3 9 4   | 2 1 4  | 1 1 3   | 2 1 2   | 1 13 2         | 1 1 3           | 2 1 3           | 3 4 9           | 0 13 3         | 2 9 5           | 2 4 11         |
| %                    | 6 3                     | 5 5     | 1 5 2   | 1 6 2  | 7 1     | 1 7 1   | 6. 81 1        | 6. 7 18         | 1 6 18          | 1 2 56          | 81 18          | 1 56 31         | 1 2 68         |
|                      | 0 3 8                   | 0 0     | 9 6 5   | 3 3 5  | 6 5 9   | 3 5 3   | 2 .2 2.        | 2 5 .7          | 2. 8. .7        | 8. 5 .2         | 0 .2 .7        | 2. .2 .2        | 2. 5 .7        |
|                      |                         |         |         |        |         |         | 5 5 5          | 5 5 5           | 5 8 5           | 8 5 5           | 5 5 5          | 5 5 5           | 5 5 5          |
| Fitness score        | 25                      | 0       | 68.75   | 62.5   | 68.75   | 87.5    | 81.25          | 68.75           | 75              | 6.25            | 62.5           | 50              | -18.75         |

For each fitness component test of the double mutations, a point is assigned in the +, = or - category, depending on the test result in comparison to the WT. '+' means that the fitness of the double mutations was significantly higher than WT. conversely, '-' means that more fitness costs were detected. '=' represents similar results were found compared to WT. The position of the numbers indicates the result of comparing the transformants to the WT. The overall fitness score for each mutant was calculated as the percentage of scores in the = category, minus the percentage of scores in the - category, plus two times the percentage of scores in the + category (100% is the WT score). In other words, we chose a weight of -1 for the - category, 1 for the = category and 2 for the + category (Shi et al., 2021).

**Table S5.** Correlation analysis between SDH activity and expression of the *sdhA* gene

| Spearman's correlations |                             | <i>sdhA</i> gene expression |
|-------------------------|-----------------------------|-----------------------------|
| SDH enzyme activity     | Correlation coefficient (r) | -0.704                      |
|                         | Significance test (P)       | 0.007                       |
|                         | Number                      | 14                          |
